# Supplementary material for: Synthesis of original polymeric hydroperoxides as innovative oxidizing agents for self-cure dental materials
Source: Royal Society of Chemistry journal article supplement (doi:10.1039/d3py00639e), 2023-01-01
Supplement: d3py00639e1.pdf [file d3py00639e1.pdf]

## **SUPPORTING INFORMATION**

### **Synthesis of original polymeric hydroperoxides as innovative oxidizing agents self-cure dental materials<sup>†</sup>**

Paul Morandi,<sup>1</sup> Yohann Catel,<sup>2</sup> Jörg Angermann,<sup>2</sup> Pascal Fässler,<sup>2</sup> Jean-Jacques Robin,<sup>1</sup>  
Sophie Monge,<sup>1\*</sup>

<sup>1</sup> ICGM, Univ Montpellier, CNRS, ENSCM, Montpellier, France

<sup>2</sup> Ivoclar Vivadent AG, Schaan FL-9494, Liechtenstein

#### **AUTHOR INFORMATION**

##### **Corresponding Author**

\* Corresponding author: S. Monge ([sophie.monge-darcos@umontpellier.fr](mailto:sophie.monge-darcos@umontpellier.fr))

##### **Author Contributions**

The manuscript was written through contributions of all authors. All authors have given approval to the final version of the manuscript.

## Synthetic procedures

### *Determination of the $[T]_0$ for oligomers synthesis by telomerisation*

The amount of 2-mercaptoethanol (2-ME) used as telogen agent (T) was calculated following the equation:

$$[T]_0 = [M]_0 / (C_T \times DP)$$

where  $[T]_0$  and  $[M]_0$  are the telogen and the monomers concentration at  $t = 0$ , respectively, DP is the degree of polymerization calculated depending on the targeted molecular weight and  $C_T$  the chain transfer constant who depends on the monomer and the telogen.<sup>1, 2</sup>

In our case,  $C_T$  had the same value for methyl methacrylate (MMA) and (4-isopropylbenzoate) 2-ethyl methacrylate (IBEMA), *i.e.* 0.67, considering that  $C_T$  has more or less the same value for the polymerization of methacrylate monomers when aliphatic thiols are used as telogen.<sup>2-4</sup>

Chain transfer constant:

$$C_T = 0.67$$

**Synthesis of poly(methyl methacrylate-*st*-(4-(2-hydroxyperoxypropyl)benzoate) 2-ethyl methacrylate) (P(MMA-*st*-HPPBEMA)) oligomers in three steps**

*Amounts of reagents needed for the synthesis of P(MMA-*st*-IBEMA) oligomers by telomerization.*

P(MMA<sub>x</sub>-*st*-IBEMA<sub>y</sub>)<sub>z</sub>

x: molar proportion (in %) of MMA monomer in the statistical oligomer

y: molar proportion (in %) of IBEMA monomer in the statistical oligomer

z: targeted molecular weight of the statistical copolymer

| Oligomer                                                               | MMA<br>(mL) | IBEMA<br>(g) | 2-ME<br>(μL) | AIBN<br>(mg) | Toluene<br>(mL) |
|------------------------------------------------------------------------|-------------|--------------|--------------|--------------|-----------------|
| P(MMA <sub>50</sub> - <i>st</i> -IBEMA <sub>50</sub> ) <sub>5000</sub> | 1.43        | 3.72         | 106          | 44           | 10              |
| P(MMA <sub>25</sub> - <i>st</i> -IBEMA <sub>75</sub> ) <sub>5000</sub> | 0.58        | 4.52         | 106          | 36           | 10              |
| P(MMA <sub>50</sub> - <i>st</i> -IBEMA <sub>50</sub> ) <sub>2500</sub> | 1.43        | 3.72         | 213          | 44           | 10              |
| P(MMA <sub>25</sub> - <i>st</i> -IBEMA <sub>75</sub> ) <sub>2500</sub> | 0.58        | 4.52         | 213          | 36           | 10              |

MMA: methyl methacrylate; IBEMA: (4-isopropylbenzoate) 2-ethyl methacrylate; 2-ME: 2-mercaptoethanol; AIBN: 2,2'-azobis(2-methylpropionitrile)

*Amounts of reagents needed for the synthesis of oxidized P(MMA-*st*-IBEMA) oligomers by oxidation reaction.*

| Oligomer                                                                        | Corresponding<br>P(MMA- <i>st</i> -IBEMA)<br>(g) | MMPP<br>(mg) | DCM/EtOH<br>(mL) |
|---------------------------------------------------------------------------------|--------------------------------------------------|--------------|------------------|
| oxidized P(MMA <sub>50</sub> - <i>st</i> -IBEMA <sub>50</sub> ) <sub>5000</sub> | 3                                                | 325          | 30               |
| oxidized P(MMA <sub>25</sub> - <i>st</i> -IBEMA <sub>75</sub> ) <sub>5000</sub> | 3                                                | 325          | 30               |
| oxidized P(MMA <sub>50</sub> - <i>st</i> -IBEMA <sub>50</sub> ) <sub>2500</sub> | 3                                                | 649          | 30               |
| oxidized P(MMA <sub>25</sub> - <i>st</i> -IBEMA <sub>75</sub> ) <sub>2500</sub> | 3                                                | 649          | 30               |

MMPP: magnesium monoperoxyphthalate; DCM/EtOH: dichloromethane/ethanol mixture (2/1, v/v)

*Amounts of reagents needed for the synthesis of P(MMA-*st*-HPPBEMA) oligomers by hydroperoxidation reaction.*

| Oligomer                                                                 | Corresponding<br>oxidized P(MMA- <i>st</i> -IBEMA)<br>(g) | NHPI<br>(mg) | AIBN<br>(mg) | Acetonitrile<br>(mL) |
|--------------------------------------------------------------------------|-----------------------------------------------------------|--------------|--------------|----------------------|
| P(MMA <sub>50</sub> - <i>st</i> -HPPBEMA <sub>50</sub> ) <sub>5000</sub> | 2.35                                                      | 50           | 60           | 25                   |
| P(MMA <sub>25</sub> - <i>st</i> -HPPBEMA <sub>75</sub> ) <sub>5000</sub> | 2.35                                                      | 60           | 73           | 25                   |
| P(MMA <sub>50</sub> - <i>st</i> -HPPBEMA <sub>50</sub> ) <sub>2500</sub> | 2.35                                                      | 49           | 60           | 25                   |
| P(MMA <sub>25</sub> - <i>st</i> -HPPBEMA <sub>75</sub> ) <sub>2500</sub> | 2.35                                                      | 60           | 72           | 25                   |

NHPI: N-hydroxyphthalimide; AIBN: 2,2'-azobis(2-methylpropionitrile)

### ***General procedure for MMA and IBEMA reactivity ratios determination using Jaacks method***

Reactivity ratios corresponding to the copolymerization of methyl methacrylate (MMA,  $M_1$ ) and (4-isopropylbenzoate) 2-ethyl methacrylate (IBEMA,  $M_2$ ) were determined following Jaacks method.<sup>5</sup> For such purpose, two free radical polymerization of MMA and IBEMA were carried out, each one with an excess of one monomer. The [Monomer]/[AIBN] molar ratio was equal to 100. The [MMA]/[IBEMA] molar ratio depended on the reactivity ratio determination. The [MMA]/[IBEMA] molar ratio was equal to 4 for  $r_{MMA}$  determination, and equal to 0.25 for  $r_{IBEMA}$  determination.

#### *Determination of $r_{MMA}$ (excess of MMA):*

MMA (1.26 mL, 11.80 mmol), IBEMA (817 mg,  $2.96 \times 10^{-3}$  mmol), and 2,2'-azobis(2-methylpropionitrile) (AIBN) (24 mg,  $0.15 \times 10^{-3}$  mmol) were dissolved in toluene (8 mL) in a Schlenk tube under nitrogen. The mixture was degassed by three freeze-pump-thaw cycles and then heated at 70 °C under nitrogen in a thermostated oil bath. In order to determine the evolution of the conversion of each monomer, samples were taken at specific different times: 5, 15, 30, 60, 90, 120, 180 and 240 minutes.

#### *Determination of $r_{IBEMA}$ (excess of IBEMA):*

MMA (0.177 mL,  $1.66 \times 10^{-3}$  mmol), IBEMA (1.834 g, 6.64 mmol), and 2,2'-azobis(2-methylpropionitrile) (AIBN) (14 mg,  $0.085 \times 10^{-3}$  mmol) were dissolved in toluene (8 mL) in a Schlenk tube under nitrogen. The mixture was degassed by three freeze-pump-thaw cycles and then heated at 70 °C under nitrogen in a thermostated oil bath. In order to determine the evolution of the conversion of each monomer, samples were taken at specific different times: 5, 15, 30, 60, 90, 120, 180 and 240 minutes.

Using the rate of conversion of each monomer, the curves  $f\left(\ln \frac{[M_2]}{[M_2]_0}\right) = \ln \frac{[M_1]}{[M_1]_0}$  (for  $r_{MMA}$  determination) and  $f\left(\ln \frac{[M_1]}{[M_1]_0}\right) = \ln \frac{[M_2]}{[M_2]_0}$  (for  $r_{IBEMA}$  determination) were plotted, and the fitting of these curves finally gave the reactivity ratio of each monomer (where  $M_1$  is MMA and  $M_2$  is IBEMA). Indeed, by using an excess of one monomer over the other, the Lewis & Mayo equation  $\left(\frac{d[M_1]}{d[M_2]} = \frac{[M_1](r_1[M_1]+[M_2])}{[M_2](r_2[M_2]+[M_1])}\right)$  can be simplified by neglecting the  $[M_1]$  or  $[M_2]$  concentration. The equation then becomes  $\frac{d[M_1]}{[M_1]} = r_1 \frac{d[M_2]}{[M_2]}$  and  $\frac{d[M_2]}{[M_2]} = r_2 \frac{d[M_1]}{[M_1]}$  by neglecting  $[M_2]$  and  $[M_1]$ , respectively. Finally, the integrations  $\int_{[M_1]_0}^{[M_1]} \frac{d[M_1]}{[M_1]} = r_1 \int_{[M_2]_0}^{[M_2]} \frac{d[M_2]}{[M_2]}$  and  $\int_{[M_2]_0}^{[M_2]} \frac{d[M_2]}{[M_2]} = r_2 \int_{[M_1]_0}^{[M_1]} \frac{d[M_1]}{[M_1]}$  allowed us determining the reactivity ratios, as the equations can be simplified by  $r_1 \left(\ln \frac{[M_2]}{[M_2]_0}\right) = \ln \frac{[M_1]}{[M_1]_0}$  (Fig. S1) and  $r_2 \left(\ln \frac{[M_1]}{[M_1]_0}\right) = \ln \frac{[M_2]}{[M_2]_0}$  (Fig. S2).



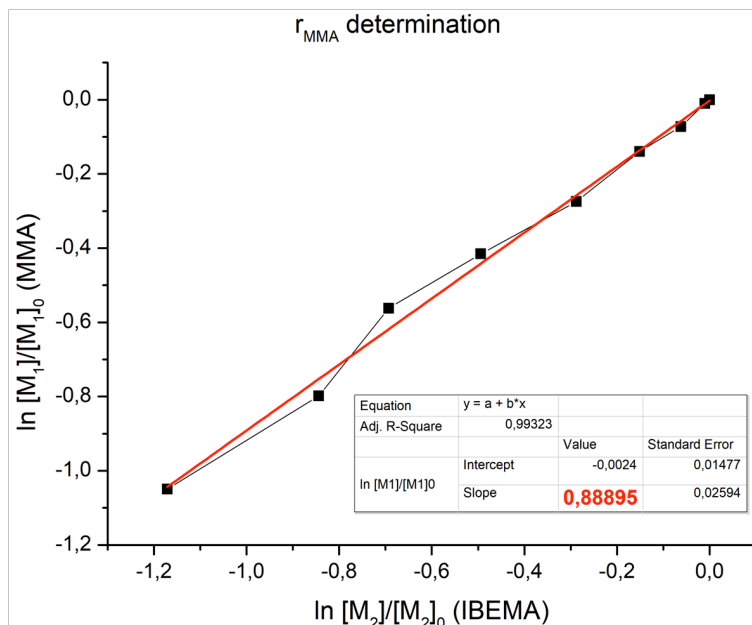

**Fig. S1** MMA reactivity ratio determination using Jaacks method:  $r_{\text{MMA}} \times \ln([M_2]/[M_2]_0) = \ln([M_1]/[M_1]_0)$  ( $M_1$  and  $M_2$  are MMA and IBEMA, respectively).

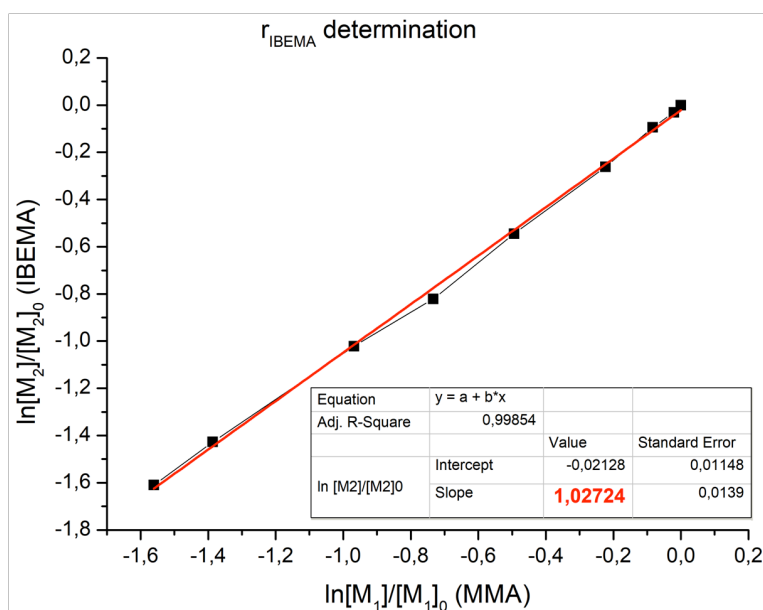

**Fig. S2** IBEMA reactivity ratio determination using Jaacks method:  $r_{\text{IBEMA}} \times \ln([M_1]/[M_1]_0) = \ln([M_2]/[M_2]_0)$  ( $M_1$  and  $M_2$  are MMA and IBEMA, respectively).

## Characterizations of synthesized monomer, model molecules and oligomers

### Characterization of the (4-isopropylbenzoate) 2-ethyl methacrylate (IBEMA) monomer

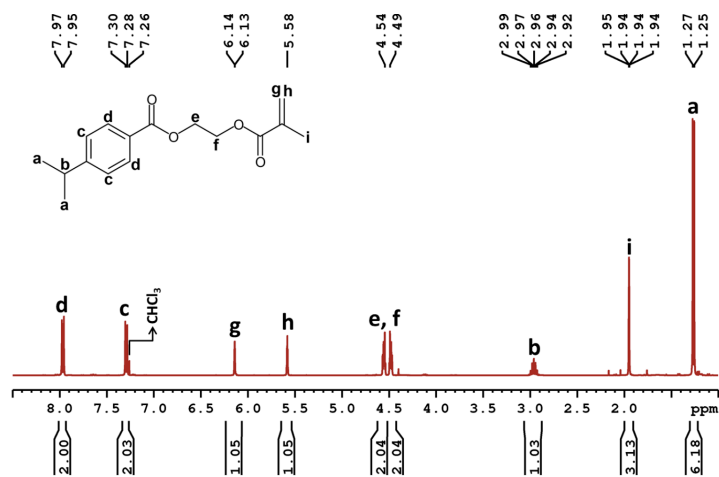

Fig. S3 <sup>1</sup>H NMR (400 MHz, CDCl<sub>3</sub>) spectrum, and proton assignments for the IBEMA monomer.

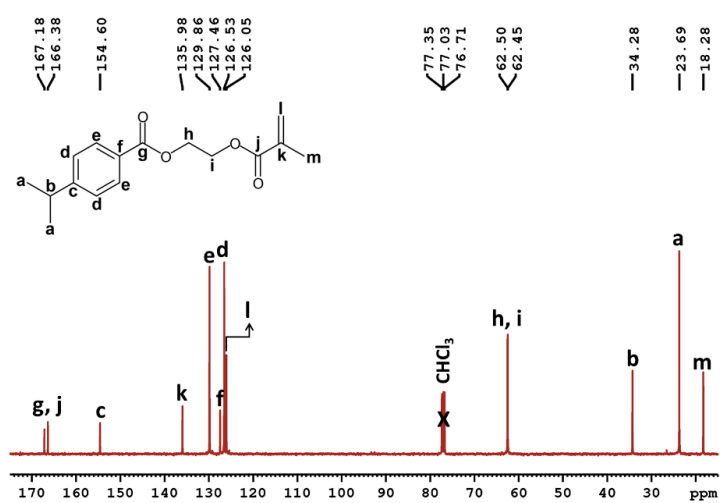

Fig. S4 <sup>13</sup>C NMR (600 MHz, CDCl<sub>3</sub>) spectrum, and carbon assignments for the IBEMA monomer.

Characterization of the poly((4-isopropylbenzoate) 2-ethyl methacrylate) (PIBEMA<sub>2500</sub>) oligomer ( $M_{n \text{ targ}} = 2500 \text{ g.mol}^{-1}$ )

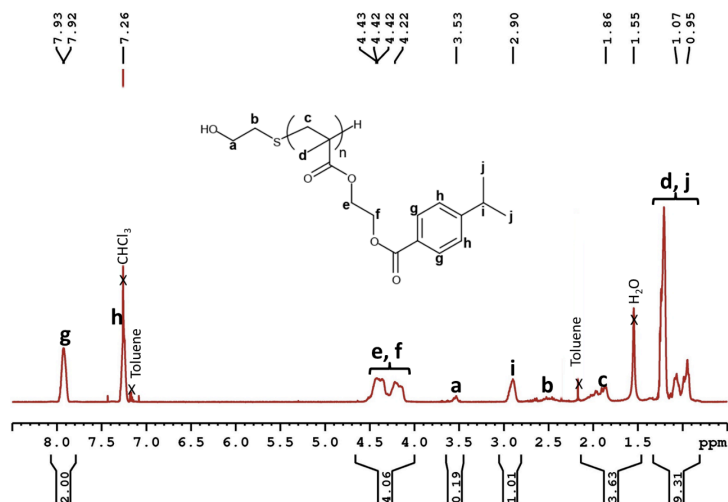

Fig. S5 <sup>1</sup>H NMR (600 MHz, CDCl<sub>3</sub>) spectrum, and proton assignments for PIBEMA<sub>2500</sub> oligomer.

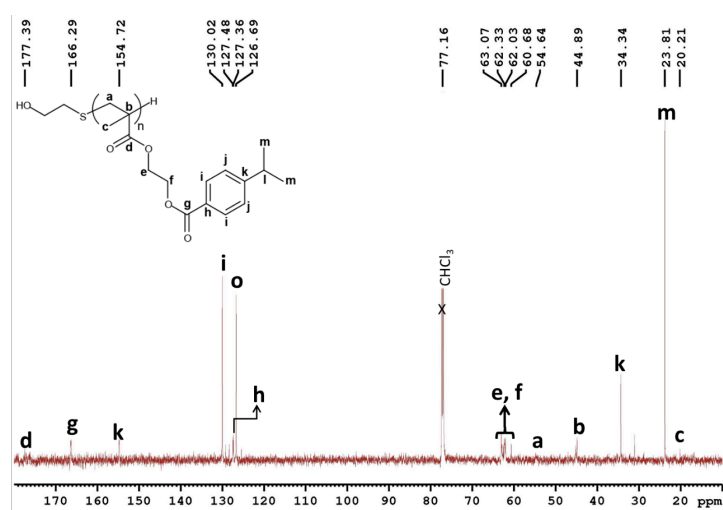

Fig. S6 <sup>13</sup>C NMR (600 MHz, CDCl<sub>3</sub>) spectrum, and carbon assignments for PIBEMA<sub>2500</sub> oligomers

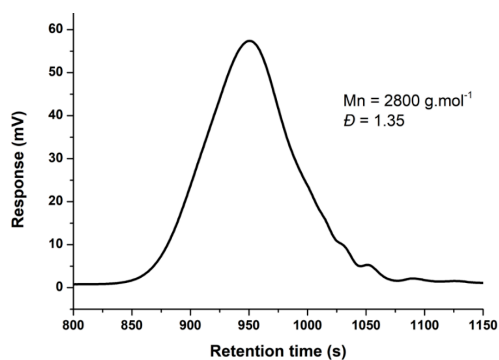

Fig. S7 Size exclusion chromatogram of PIBEMA<sub>2500</sub> oligomer (eluent: THF + 0.05 wt % toluene, PMMA standards).

Characterization of the poly(methyl methacrylate-*st*-(4-isopropylbenzoate) 2-ethyl methacrylate) ( $P(MMA_{50}\text{-}st\text{-}IBEMA_{50})_{5000}$  oligomer

$[MMA]/[IBEMA] = 50/50$  (mol %/ mol %),  $M_n \text{ targ} = 5000 \text{ g}\cdot\text{mol}^{-1}$

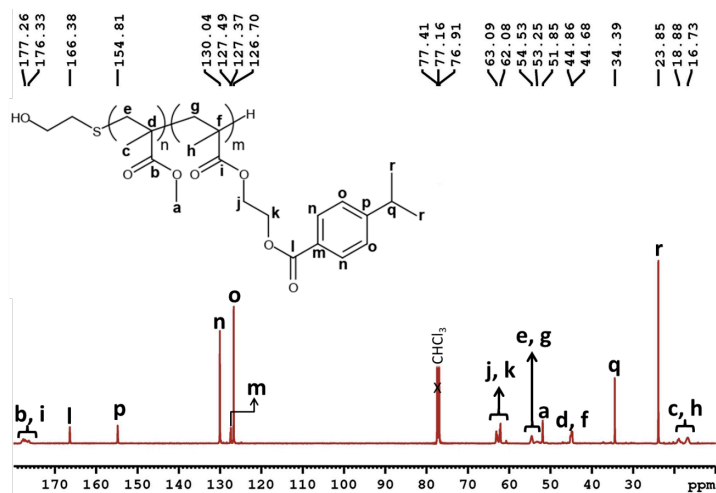

**Fig. S8**  $^{13}\text{C}$  NMR (600 MHz,  $\text{CDCl}_3$ ) spectrum, and carbon assignments for  $P(MMA_{50}\text{-}st\text{-}IBEMA_{50})_{5000}$  oligomer.

Characterization of the poly(methyl methacrylate-*st*-(4-isopropylbenzoate) 2-ethyl methacrylate) (P(MMA<sub>25</sub>-*st*-IBEMA<sub>75</sub>)<sub>5000</sub> oligomer

[MMA]/[IBEMA] = 25/75 (mol %/ mol %),  $M_n$  targ = 5000 g.mol<sup>-1</sup>

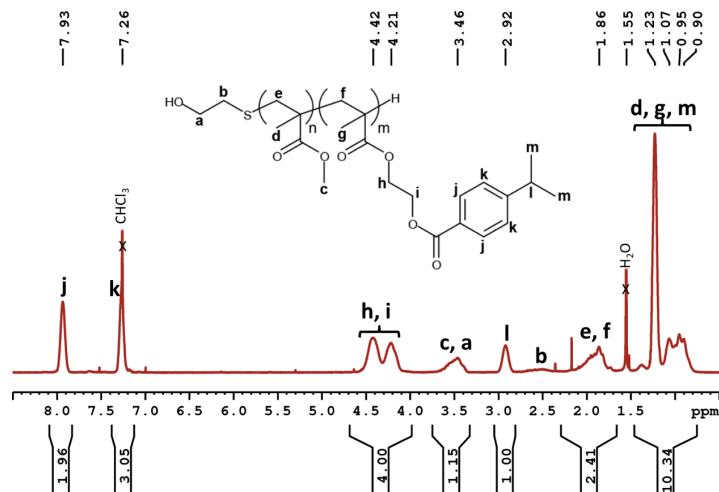

Fig. S9 <sup>1</sup>H NMR (400 MHz, CDCl<sub>3</sub>) spectrum, and proton assignments for P(MMA<sub>25</sub>-*st*-IBEMA<sub>75</sub>)<sub>5000</sub> oligomer.

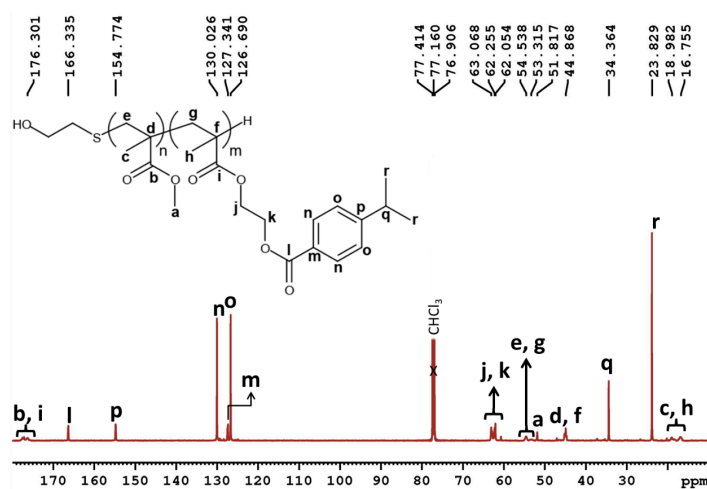

Fig. S10 <sup>13</sup>C NMR (600 MHz, CDCl<sub>3</sub>) spectrum, and carbon assignments for P(MMA<sub>25</sub>-*st*-IBEMA<sub>75</sub>)<sub>5000</sub> oligomer.

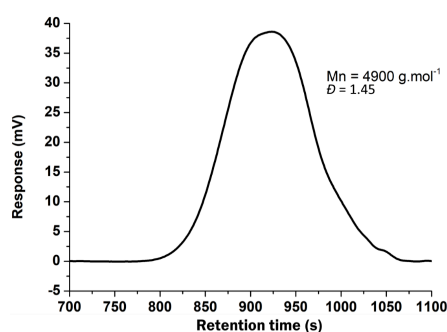

Fig. S11 Size exclusion chromatogram of P(MMA<sub>25</sub>-*st*-IBEMA<sub>75</sub>)<sub>5000</sub> oligomer (eluent: THF + 0.05 wt % toluene, PMMA standards).

Characterization of the poly(methyl methacrylate-*st*-(4-isopropylbenzoate) 2-ethyl methacrylate) (P(MMA<sub>50</sub>-*st*-IBEMA<sub>50</sub>)<sub>2500</sub> oligomer

[MMA]/[IBEMA] = 50/50 (mol %/ mol %),  $M_n$  targ = 2500 g.mol<sup>-1</sup>

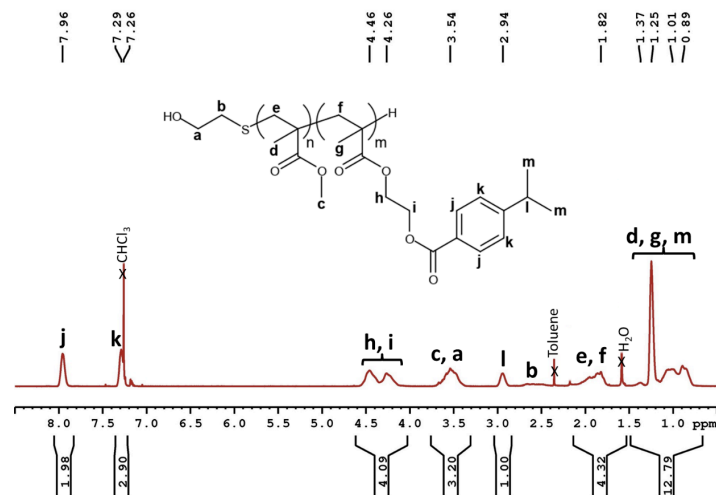

**Fig. S12** <sup>1</sup>H NMR (600 MHz, CDCl<sub>3</sub>) spectrum, and proton assignments for P(MMA<sub>50</sub>-*st*-IBEMA<sub>50</sub>)<sub>2500</sub> oligomer.

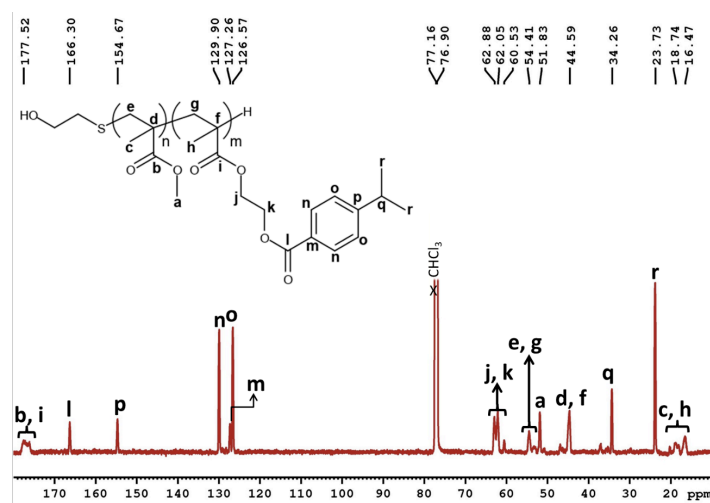

**Fig. S13** <sup>13</sup>C NMR (600 MHz, CDCl<sub>3</sub>) spectrum, and carbon assignments for P(MMA<sub>50</sub>-*st*-IBEMA<sub>50</sub>)<sub>2500</sub> oligomer.

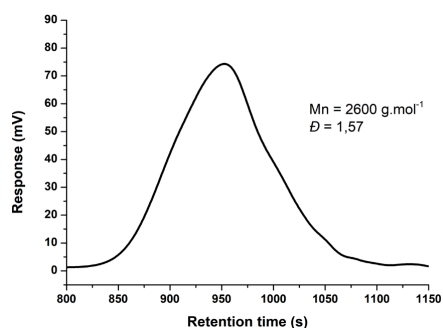

**Fig. S14** Size exclusion chromatogram of P(MMA<sub>50</sub>-*st*-IBEMA<sub>50</sub>)<sub>2500</sub> oligomer (eluent: THF + 0.05 wt % toluene, PMMA standards).

Characterization of the poly(methyl methacrylate-*st*-(4-isopropylbenzoate) 2-ethyl methacrylate) (P(MMA<sub>25</sub>-*st*-IBEMA<sub>75</sub>)<sub>2500</sub> oligomer

[MMA]/[IBEMA] = 25/75 (mol %/ mol %),  $M_n$  targ = 2500 g.mol<sup>-1</sup>

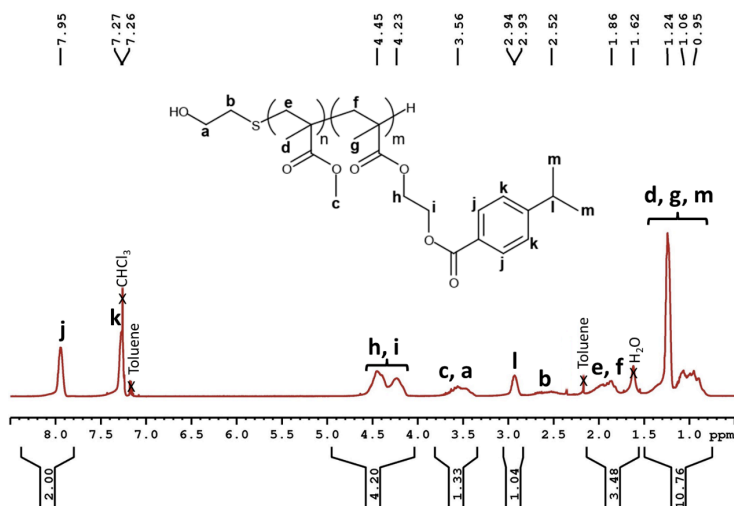

**Fig. S15** <sup>1</sup>H NMR (600 MHz, CDCl<sub>3</sub>) spectrum, and proton assignments for P(MMA<sub>25</sub>-*st*-IBEMA<sub>75</sub>)<sub>2500</sub> oligomer.

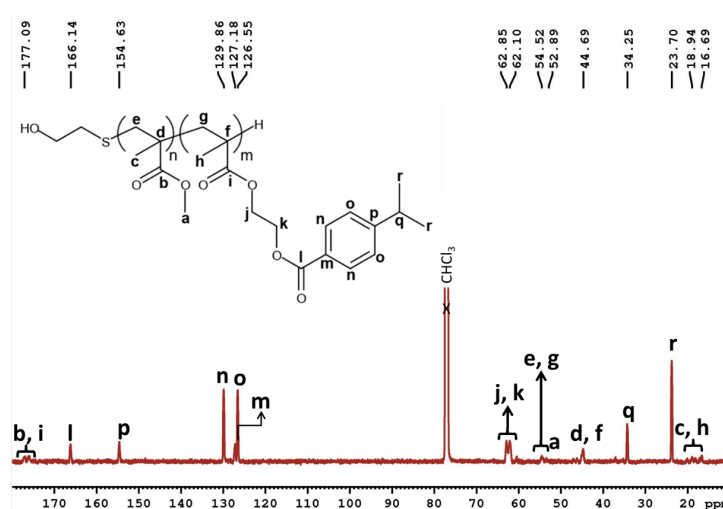

**Fig. S16** <sup>13</sup>C NMR (600 MHz, CDCl<sub>3</sub>) spectrum, and carbon assignments for P(MMA<sub>25</sub>-*st*-IBEMA<sub>75</sub>)<sub>2500</sub> oligomer.

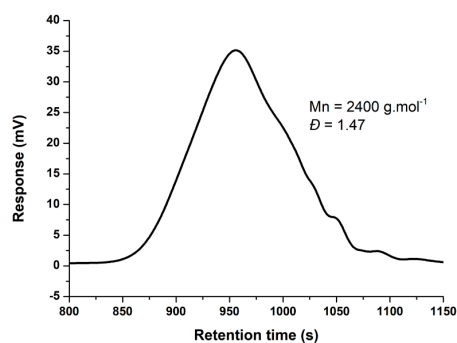

**Fig. S17** Size exclusion chromatogram of P(MMA<sub>25</sub>-*st*-IBEMA<sub>75</sub>)<sub>2500</sub> oligomer (eluent: THF + 0.05 wt % toluene, PMMA standards).

Characterization of oxidized poly((4-isopropylbenzoate) 2-ethyl methacrylate) (oxidized PIBEMA<sub>2500</sub>) oligomer ( $M_{n \text{ targ}} = 2500 \text{ g.mol}^{-1}$ )

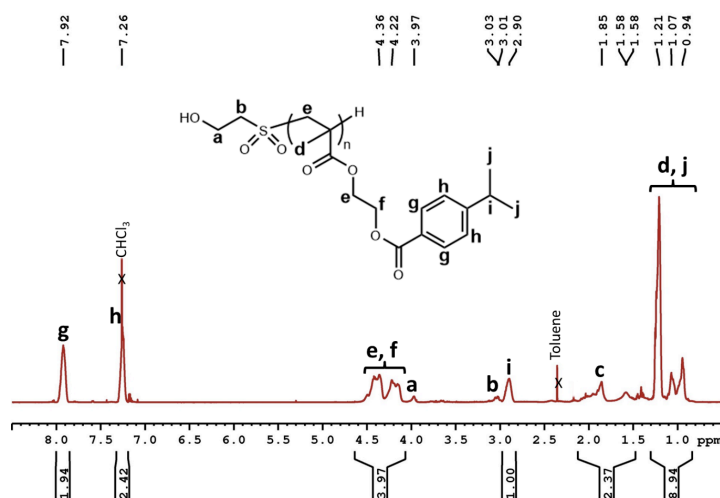

**Fig. S18** <sup>1</sup>H NMR (400 MHz, CDCl<sub>3</sub>) spectrum, and proton assignments for oxidized PIBEMA<sub>2500</sub> oligomer.

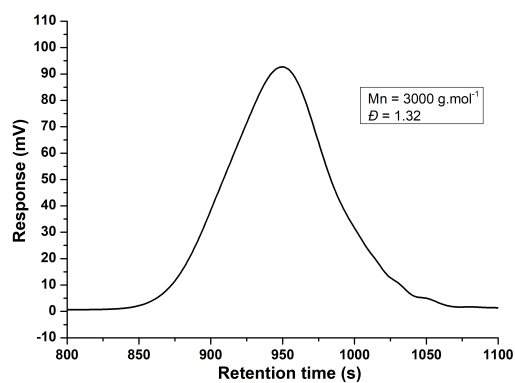

**Fig. S19** Size exclusion chromatogram of oxidized PIBEMA<sub>2500</sub> oligomer (eluent: THF + 0.05 wt % toluene, PMMA standards).



*Characterization of the oxidized poly(methyl methacrylate-st-(4-isopropylbenzoate) 2-ethyl methacrylate) (oxidized P(MMA<sub>50</sub>-st-IBEMA<sub>50</sub>)<sub>5000</sub> oligomer*

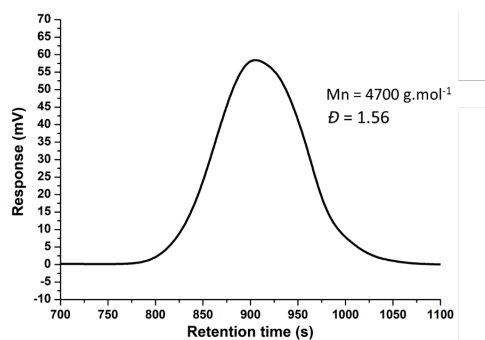

**Fig. S20** Size exclusion chromatogram of oxidized P(MMA<sub>50</sub>-st-IBEMA<sub>50</sub>)<sub>5000</sub> oligomer (eluent: THF + 0.05 wt % toluene, PMMA standards).

Characterization of the oxidized poly(methyl methacrylate-*st*-(4-isopropylbenzoate) 2-ethyl methacrylate) (oxidized P(MMA<sub>25</sub>-*st*-IBEMA<sub>75</sub>)<sub>5000</sub> oligomer

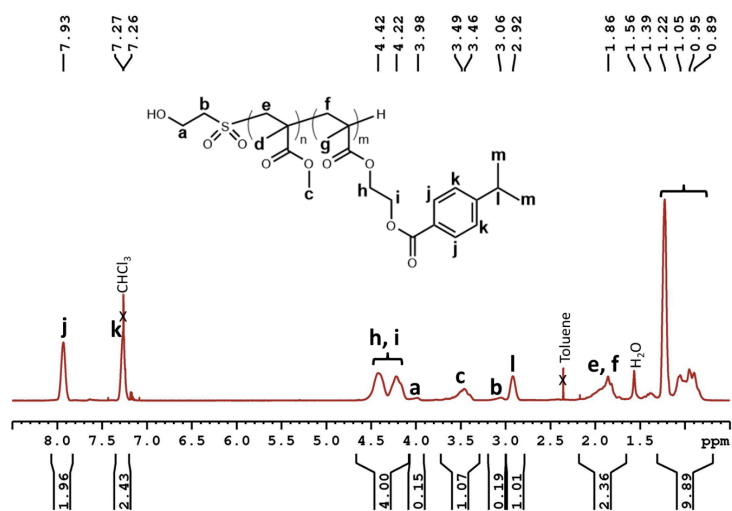

**Fig. S21** <sup>1</sup>H NMR (400 MHz, CDCl<sub>3</sub>) spectrum, and proton assignments for oxidized P(MMA<sub>25</sub>-*st*-IBEMA<sub>75</sub>)<sub>5000</sub> oligomer.

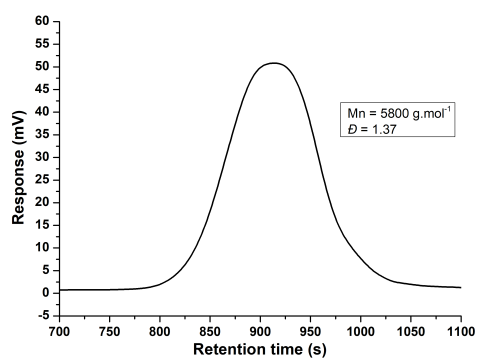

**Fig. S22** Size exclusion chromatogram of oxidized P(MMA<sub>25</sub>-*st*-IBEMA<sub>75</sub>)<sub>5000</sub> oligomer (eluent: THF + 0.05 wt % toluene, PMMA standards).

Characterization of the oxidized poly(methyl methacrylate-*st*-(4-isopropylbenzoate) 2-ethyl methacrylate) (oxidized P(MMA<sub>50</sub>-*st*-IBEMA<sub>50</sub>)<sub>2500</sub> oligomer

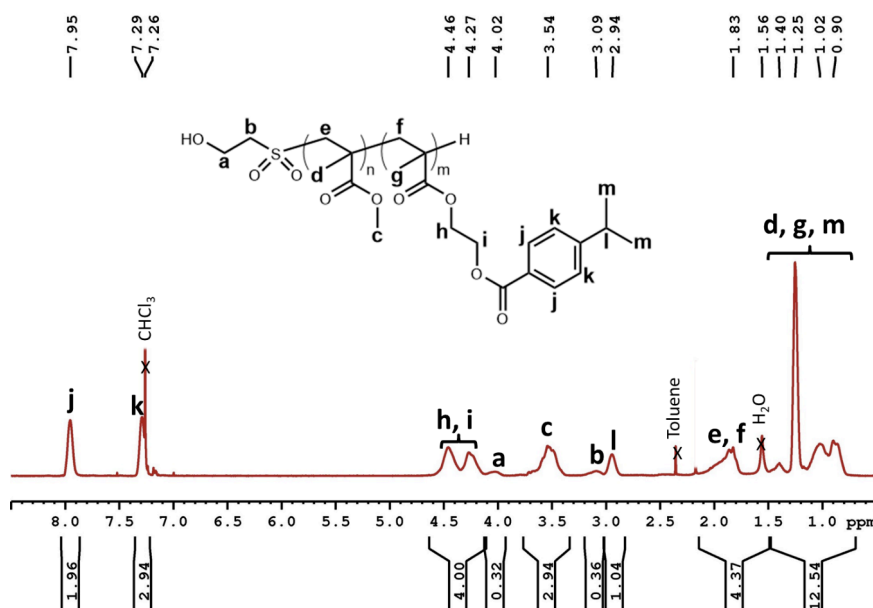

**Fig. S23** <sup>1</sup>H NMR (400 MHz, CDCl<sub>3</sub>) spectrum, and proton assignments for oxidized P(MMA<sub>50</sub>-*st*-IBEMA<sub>50</sub>)<sub>2500</sub> oligomer.

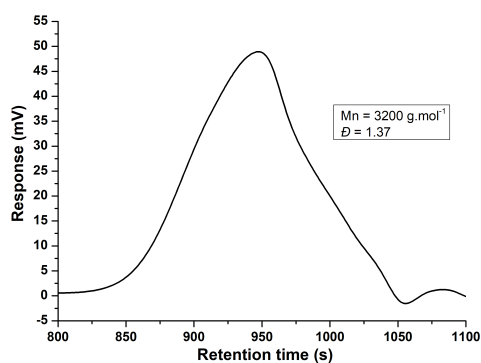

**Fig. S24.** Size exclusion chromatogram of oxidized P(MMA<sub>50</sub>- *st*-IBEMA<sub>50</sub>)<sub>2500</sub> oligomer (eluent: THF + 0.05 wt % toluene, PMMA standards).

Characterization of the oxidized poly(methyl methacrylate-*st*-(4-isopropylbenzoate) 2-ethyl methacrylate) (oxidized P(MMA<sub>25</sub>-*st*-IBEMA<sub>75</sub>)<sub>2500</sub> oligomer

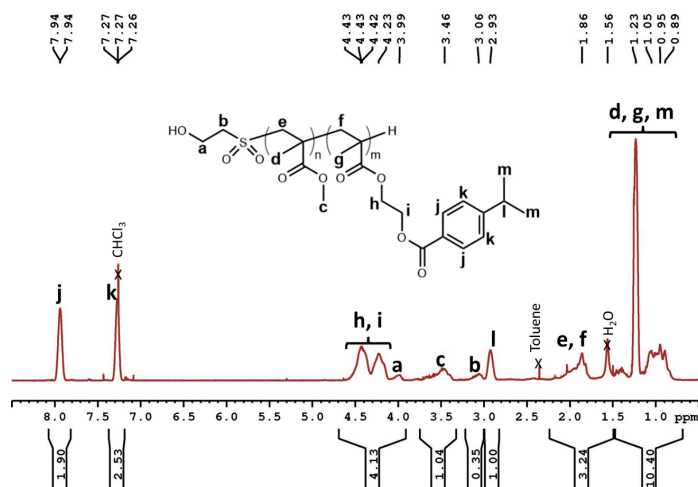

**Fig. S25** <sup>1</sup>H NMR (400 MHz, CDCl<sub>3</sub>) spectrum, and proton assignments for oxidized P(MMA<sub>25</sub>-*st*-IBEMA<sub>75</sub>)<sub>2500</sub> oligomer.

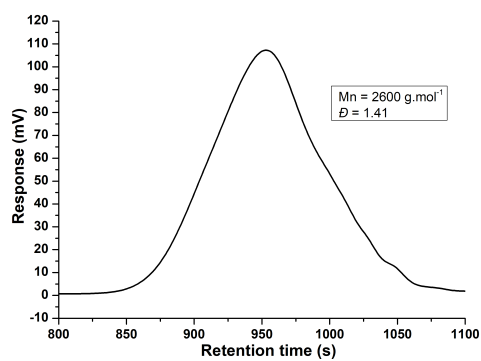

**Fig. S26** Size exclusion chromatogram of oxidized P(MMA<sub>25</sub>-*st*-IBEMA<sub>75</sub>)<sub>2500</sub> oligomer (eluent: THF + 0.05 wt % toluene, PMMA standards).

Characterization of poly(4-(2-hydroxyperoxypropyl)benzoate) 2-ethyl methacrylate (PHPPBEMA<sub>2500</sub>) oligomer

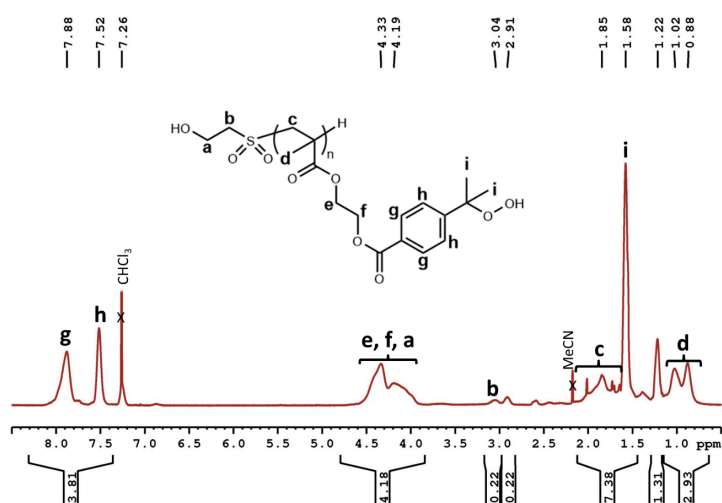

Fig. S27 <sup>1</sup>H NMR (600 MHz, CDCl<sub>3</sub>) spectrum, and proton assignments for PHPPBEMA<sub>2500</sub> oligomer.

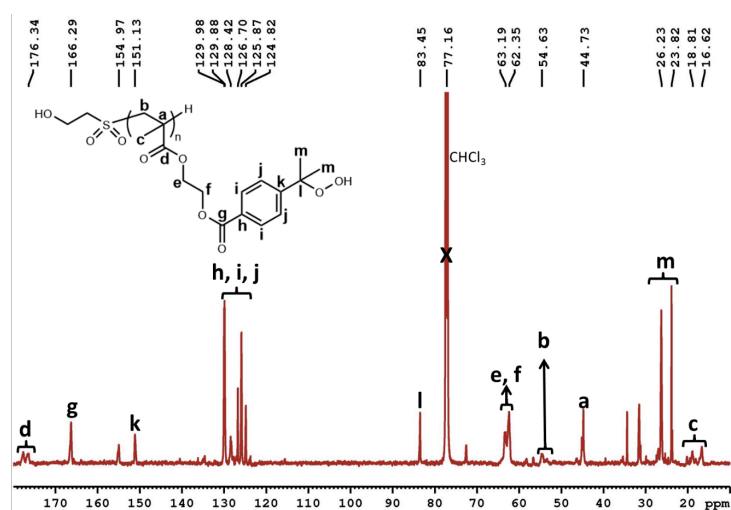

Fig. S28 <sup>13</sup>C NMR (600 MHz, CDCl<sub>3</sub>) spectrum, and carbon assignments for PHPPBEMA<sub>2500</sub> oligomer.

Characterization of poly(methyl methacrylate-*st*-(4-(2-hydroxyperoxypropyl)benzoate) 2-ethyl methacrylate) (P(MMA<sub>50</sub>-*st*-HPPBEMA<sub>50</sub>)<sub>5000</sub>) oligomer

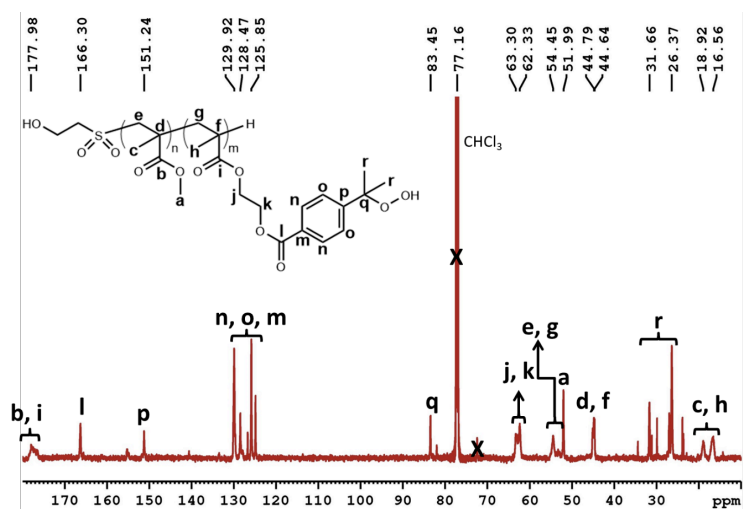

**Fig. S29** <sup>13</sup>C NMR (600 MHz, CDCl<sub>3</sub>) spectrum, and carbon assignments for P(MMA<sub>50</sub>-*st*-HPPBEMA<sub>50</sub>)<sub>5000</sub> oligomer.

Characterization of poly(methyl methacrylate-*st*-(4-(2-hydroxyperoxypropyl)benzoate) 2-ethyl methacrylate) (P(MMA<sub>25</sub>-*st*-HPPBEMA<sub>75</sub>)<sub>5000</sub>) oligomer

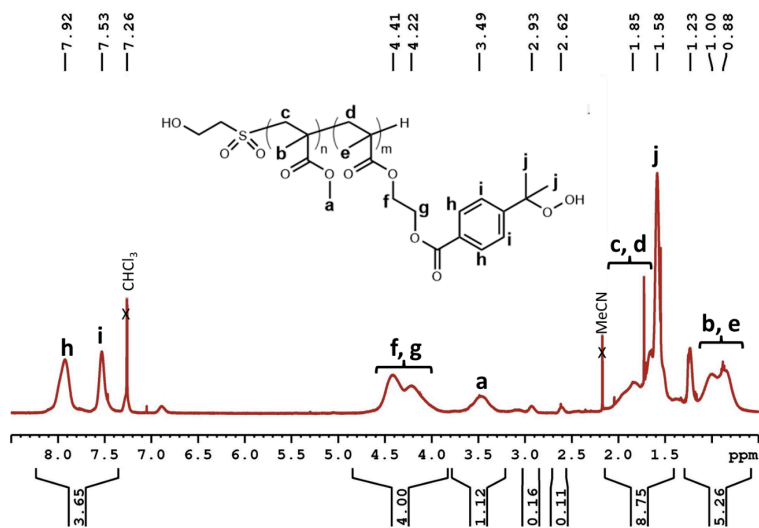

**Fig. S30** <sup>1</sup>H NMR (400 MHz, CDCl<sub>3</sub>) spectrum, and proton assignments for P(MMA<sub>25</sub>-*st*-HPPBEMA<sub>75</sub>)<sub>5000</sub> oligomer.

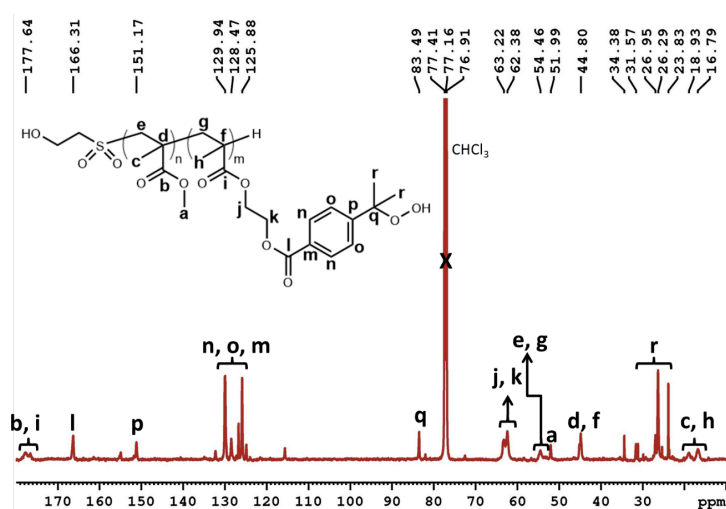

**Fig. S31** <sup>13</sup>C NMR (600 MHz, CDCl<sub>3</sub>) spectrum, and carbon assignments for P(MMA<sub>25</sub>-*st*-HPPBEMA<sub>75</sub>)<sub>5000</sub> oligomer.

Characterization of poly(methyl methacrylate-*st*-(4-(2-hydroxyperoxypropyl)benzoate) 2-ethyl methacrylate) ( $P(MMA_{50}\text{-}st\text{-}HPPBEMA_{50})_{2500}$ ) oligomer

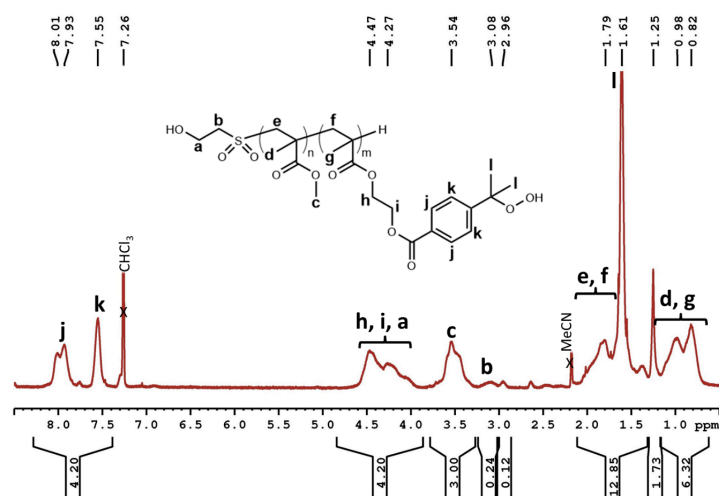

**Fig. S32**  $^1\text{H}$  NMR (500 MHz,  $\text{CDCl}_3$ ) spectrum, and proton assignments for  $P(MMA_{50}\text{-}st\text{-}HPPBEMA_{50})_{2500}$  oligomer.

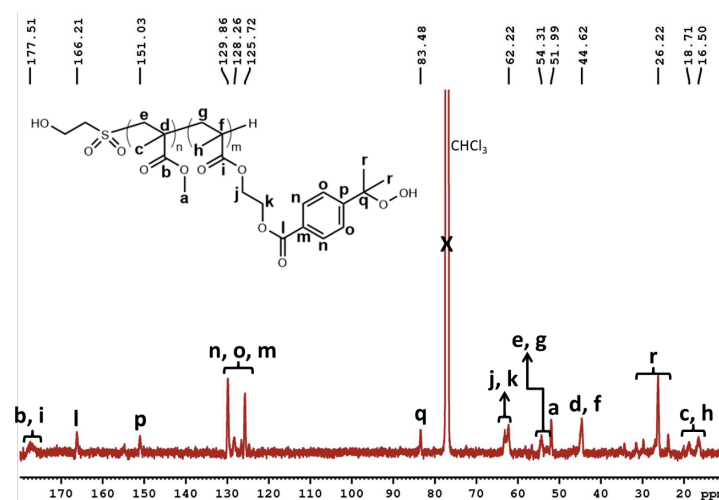

**Fig. S33**  $^{13}\text{C}$  NMR (500 MHz,  $\text{CDCl}_3$ ) spectrum, and carbon assignments for  $P(MMA_{50}\text{-}st\text{-}HPPBEMA_{50})_{2500}$  oligomer.



Characterization of poly(methyl methacrylate-*st*-(4-(2-hydroxyperoxypropyl)benzoate) 2-ethyl methacrylate) (P(MMA<sub>25</sub>-*st*-HPPBEMA<sub>75</sub>)<sub>2500</sub>) oligomer

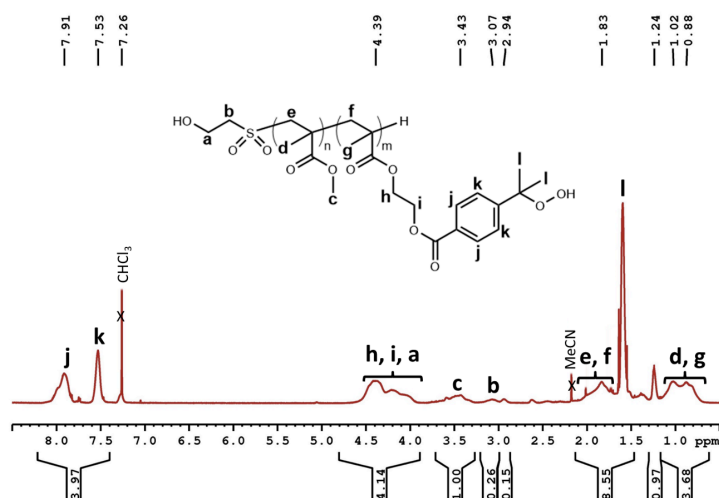

**Fig. S34** <sup>1</sup>H NMR (500 MHz, CDCl<sub>3</sub>) spectrum, and proton assignment for P(MMA<sub>25</sub>-*st*-HPPBEMA<sub>75</sub>)<sub>2500</sub> oligomer.

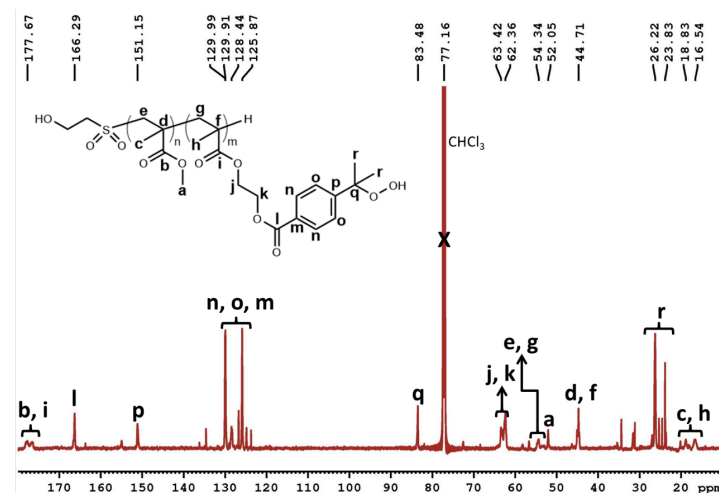

**Fig. S35** <sup>13</sup>C NMR (500 MHz, CDCl<sub>3</sub>) spectrum, and carbon assignments for P(MMA<sub>25</sub>-*st*-HPPBEMA<sub>75</sub>)<sub>2500</sub> oligomer.

Characterization of (2-methylthioethyl) 4-isopropylbenzoate (MTEPB)

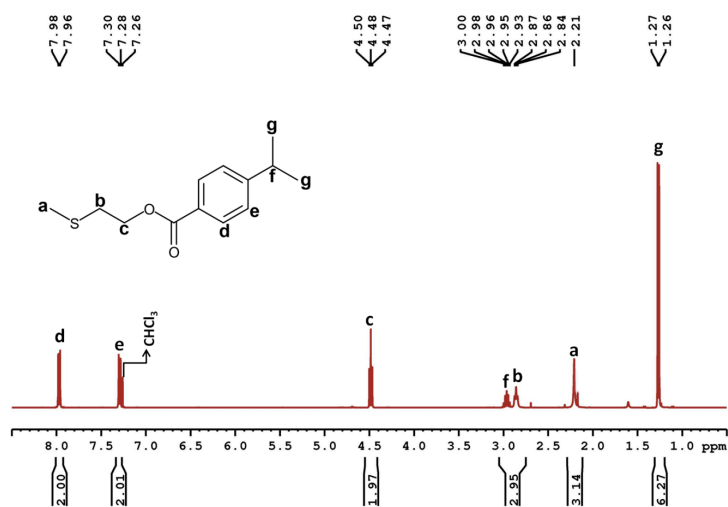

Fig. S36 <sup>1</sup>H NMR (400 MHz, CDCl<sub>3</sub>) spectrum and proton assignments for MTEPB.

Characterization of (2-methylsulfonylethyl) 4-isopropylbenzoate (MSEPB)

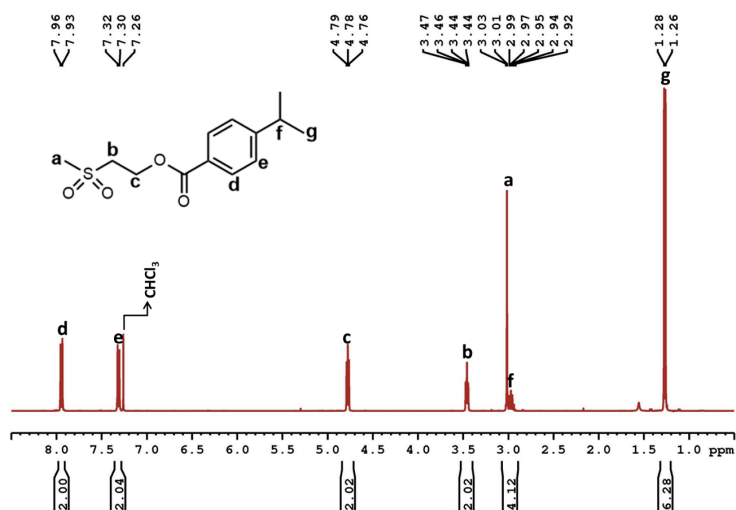

Fig. S37 <sup>1</sup>H NMR (400 MHz, CDCl<sub>3</sub>) spectrum, and proton assignments for MSEPB.

Characterization of (2-methylsulfonyl)ethyl 4-hydroxyperoxypropylbenzoate (MSEHPB)

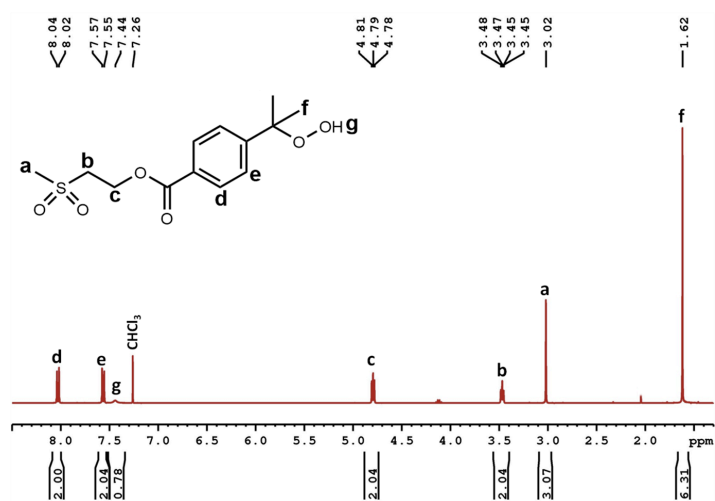

Fig. S38 <sup>1</sup>H NMR (400 MHz, CDCl<sub>3</sub>) spectrum, and proton assignments for MSEHPB.

*Mechanical properties of the different cements*

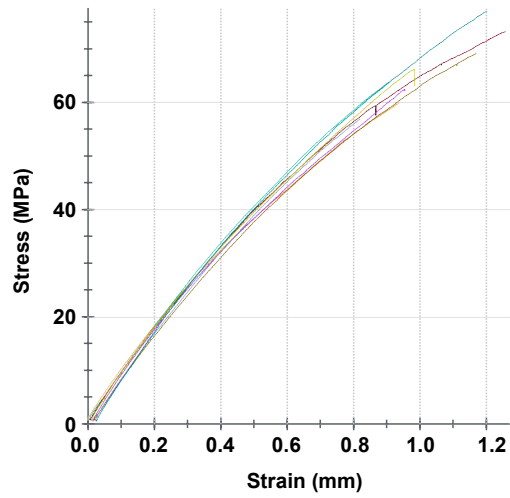

**Fig. S39** Flexural curves for the SCC1 cement (flexural strength and flexural modulus correspond to the average value of eight measurements).

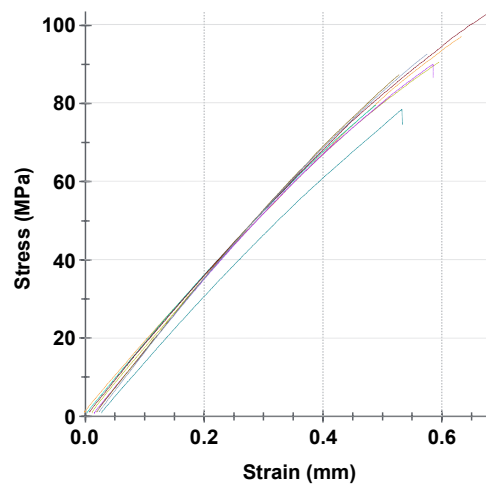

**Fig. S40** Flexural curves for the SCC2 cement (flexural strength and flexural modulus correspond to the average value of eight measurements).

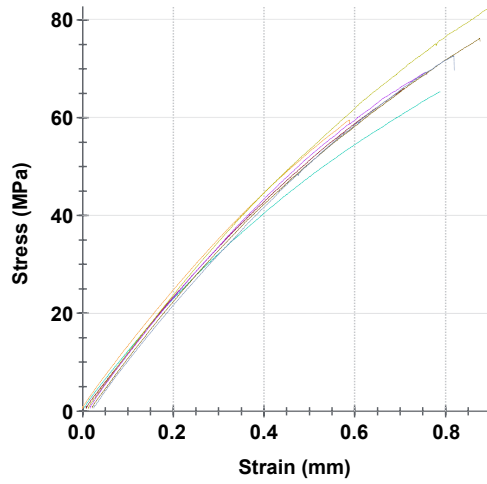

**Fig. S41** Flexural curves for the SCC3 cement (flexural strength and flexural modulus correspond to the average value of eight measurements).

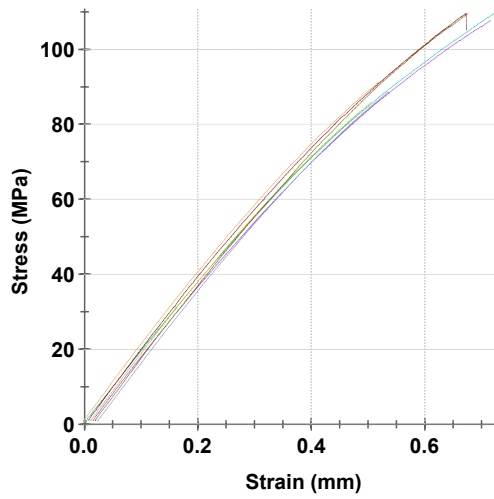

**Fig. S42** Flexural curves for the SCC4 cement (flexural strength and flexural modulus correspond to the average value of eight measurements).

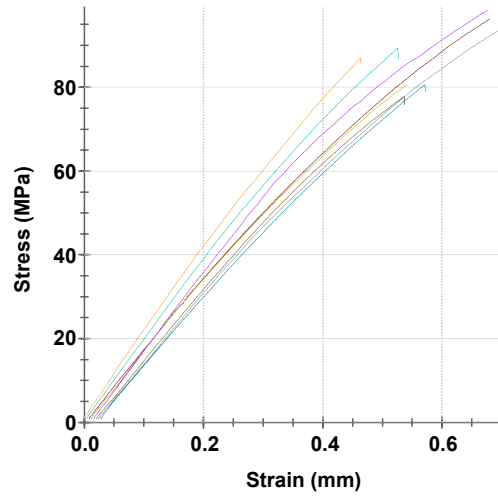

**Fig. S43** Flexural curves for the SCC5 cement (flexural strength and flexural modulus correspond to the average value of eight measurements).

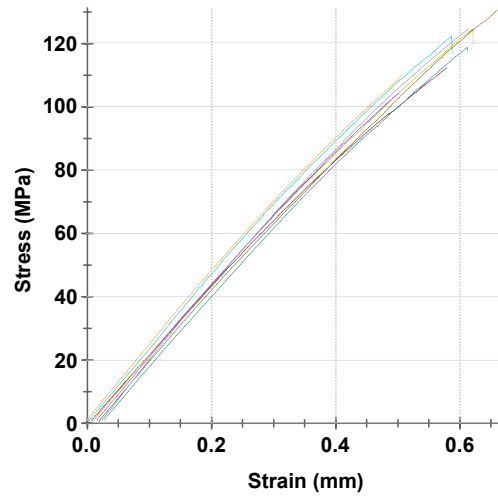

**Fig. S44** Flexural curves for the SCC6 cement (flexural strength and flexural modulus correspond to the average value of eight measurements).

## References

1. B. Boutevin, Y. Pietrasanta and G. Bauduin, *Die Makromolekulare Chemie*, 1985, **186**, 283-295.
2. J. L. De La Fuente and E. L. Madruga, *Journal of Polymer Science Part A: Polymer Chemistry*, 2000, **38**, 170-178.
3. J. L. O'Brien and F. Gornick, *Journal of the American Chemical Society*, 1955, **77**, 4757-4763.
4. C. Loubat and B. Boutevin, *Macromolecular Chemistry and Physics*, 2000, **201**, 2853-2860.
5. V. Jaacks, *Die Makromolekulare Chemie*, 1972, **161**, 161-172.
